# Supplementary material for: Surface and bulk study of strontium-rich chromium ferrite oxide as a robust solid oxide fuel cell cathode
Source: Royal Society of Chemistry journal article supplement (doi:10.1039/c5ta05815e), 2015-01-01
Supplement: c5ta05815e1.pdf [file c5ta05815e1.pdf]

## Supporting Information

### Surface and Bulk Study of Strontium-Rich Chromium Ferrite Oxide as a Robust Solid Oxide Fuel Cell Cathode

Min Chen, Scott Paulson, Wang Hay Kan, Venkataraman Thangadurai and Viola Birss \*

Department of Chemistry, University of Calgary, Calgary, AB T2N 1N4 (Canada)

\*Corresponding Author Email: [birss@ucalgary.ca](mailto:birss@ucalgary.ca)

Table S1. Electrical conductivity, average thermal expansion coefficients, and area specific resistance of a range of iron-based perovskite electrodes with the B-site iron lightly substituted by a high valence transition metal.

| Compositions                                                                                 | Conductivity at 600-800°C in air (S•cm <sup>-1</sup> ) | Average TEC (×10 <sup>-6</sup> K <sup>-1</sup> ) | ASR in symmetrical half cell (Ω•cm <sup>2</sup> ) | Ref. |
|----------------------------------------------------------------------------------------------|--------------------------------------------------------|--------------------------------------------------|---------------------------------------------------|------|
| (1) BaFe <sub>0.95</sub> Nb <sub>0.05</sub> O <sub>3-δ</sub>                                 | 4 - 8                                                  | 19.3 (RT-1000°C)                                 | 0.016 (750°C, SDC )                               | 16   |
| (2) Ba <sub>0.5</sub> Sr <sub>0.5</sub> Fe <sub>0.9</sub> Nb <sub>0.1</sub> O <sub>3-δ</sub> | 7 - 9                                                  | 19.2 (RT-1000°C)                                 | 0.033 (750°C, SDC )                               | 17   |
| (3) SrFe <sub>0.9</sub> Nb <sub>0.1</sub> O <sub>3-δ</sub>                                   | 34-70                                                  | 22.1 (RT-1000°C)                                 | 0.031 (750°C, SDC )                               | 18   |
| (4) SrFe <sub>0.8</sub> Mo <sub>0.2</sub> O <sub>3-δ</sub>                                   | 30 - 45                                                | 25.7 (RT - 800°C)                                | 0.074(800°C, LSGM )                               | 18   |
| (5) SrFe <sub>0.75</sub> Ti <sub>0.25</sub> O <sub>3-δ</sub>                                 | 38 - 40                                                |                                                  | 0.083(800°C, LSGM )                               | 18   |
| (6) SrFe <sub>0.75</sub> Cr <sub>0.25</sub> O <sub>3-δ</sub>                                 | 28- 30                                                 |                                                  | 0.062(800°C, LSGM )                               | 18   |
| (7) Sr <sub>2</sub> Fe <sub>1.5</sub> Mo <sub>0.5</sub> O <sub>6-δ</sub>                     | 50 - 600                                               | 18.1 (200 - 1200°C)                              | 0.240 (800°C, LSGM )                              | 18   |
| (8) La <sub>0.3</sub> Sr <sub>0.7</sub> Fe <sub>0.7</sub> Cr <sub>0.3</sub> O <sub>3-δ</sub> | 74 - 103                                               | 16.3 (50 - 900°C)                                | 0.105 (800°C, LSGM )                              | 19   |
| (9) La <sub>0.6</sub> Sr <sub>0.4</sub> Fe <sub>0.8</sub> Co <sub>0.2</sub> O <sub>3-δ</sub> | 375 - 425                                              | 16.8(100 - 900°C)                                | 0.180 (800°C, SDC )                               | 20   |

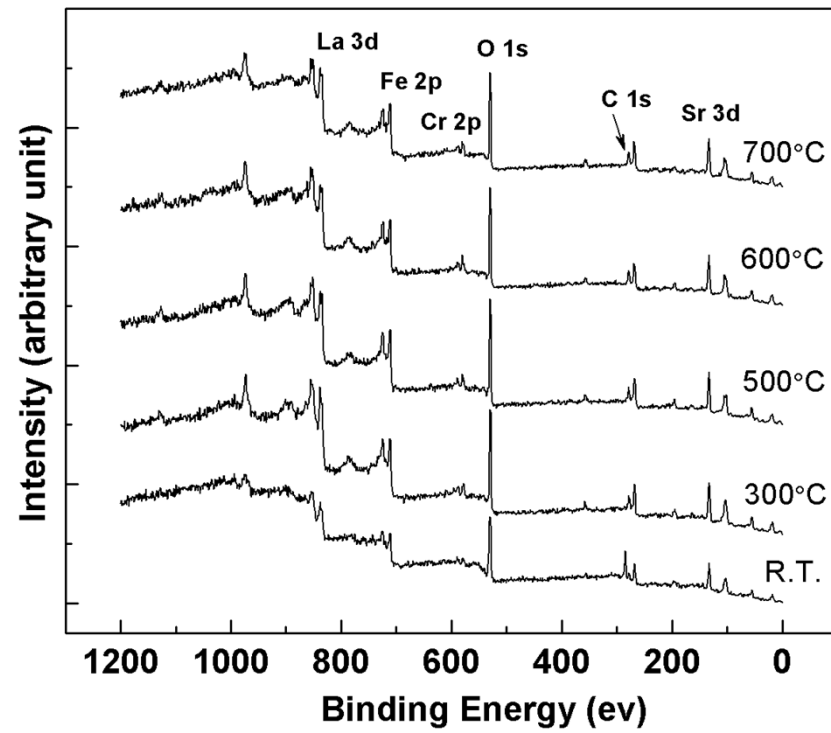

Fig. S1. Low resolution (survey scan) *in-situ* XPS spectra of  $\text{La}_{0.3}\text{Sr}_{0.7}\text{Fe}_{0.7}\text{Cr}_{0.3}\text{O}_{3-\delta}$  specimen from room temperature (R.T.) to 700 °C.

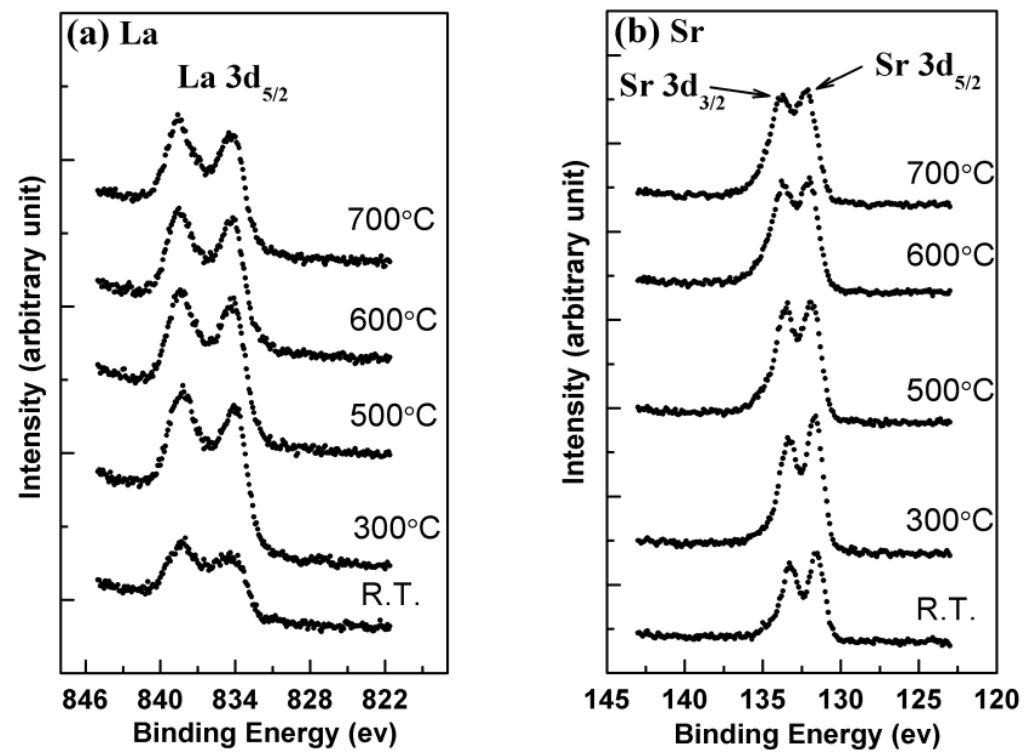

Fig. S2. High resolution *in-situ* XPS spectra of (a) La 3d<sub>5/2</sub> and (b) Sr 3d collected from room temperature (R.T.) to 700 °C.

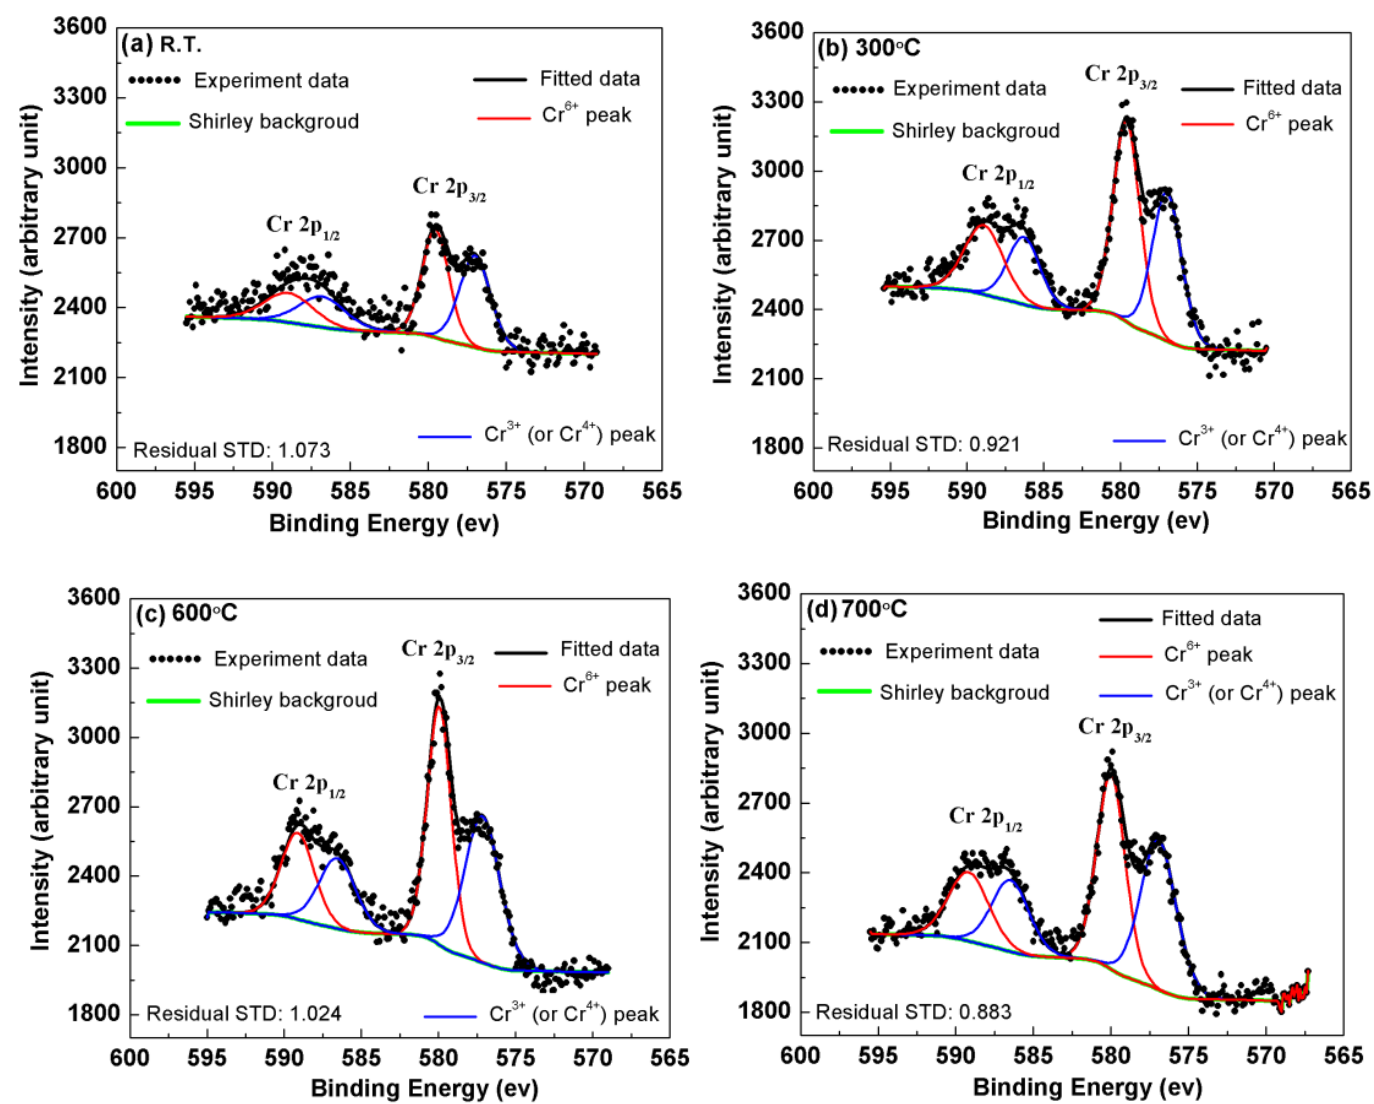

Fig. S3. Fitting patterns of Cr 2p<sub>3/2</sub> spectrum for the LSF<sub>Cr-3</sub> specimen collected from room temperature to 700 °C.
